# Supplementary material for: The chromosome-level reference genome of Coptischinensis provides insights into genomic evolution and berberine biosynthesis
Source: PubMed Central journal article supplement (PMC8166882; doi:10.1038/s41438-021-00559-2), 2021-06-01
Supplement: 41438_2021_559_MOESM1_ESM.pdf [file 41438_2021_559_MOESM1_ESM.pdf]

---

**Supplemental Table 1. 17 K-mer statistics**

---

| K-mer | K-mer number    | K-mer Depth | Genome Size (Mbp) | Revised Genome Size | Heterozygous Ratio (%) | Repeat (%) |
|-------|-----------------|-------------|-------------------|---------------------|------------------------|------------|
| 17    | 103,815,432,824 | 98          | 1059.34           | 1046.91             | 0.77                   | 73.96      |

---

**Supplemental Table 2. The sequencing data of *Coptis chinensis***

| Pair-end libraries | Insert size | Total data (G) | Read length (bp) | Sequence coverage (X) |
|--------------------|-------------|----------------|------------------|-----------------------|
| Illumina reads     | 350bp       | 136.69         | 150              | 130.57                |
| PacBio reads       | —           | 118.36         | —                | 113.06                |
| 10X Genomics       | —           | 130.73         | 150              | 124.87                |
| Hic                | —           | 95.99          | —                | 91.69                 |
| Total              | —           | 481.77         | —                | 460.19                |

---

**Supplemental Table 3. The de novo assembly results of *Coptis chinensis* .**

---

| Characteristic     | Length        |               | Number   |          |
|--------------------|---------------|---------------|----------|----------|
|                    | Contig** (bp) | Scaffold (bp) | Contig** | Scaffold |
| Total              | 955006981     | 958200615     | 940      | 425      |
| Max                | 8967247       | 19442731      | -        | -        |
| Number $\geq$ 2000 | -             | -             | 939      | 424      |
| N50                | 1581007       | 4529715       | 187      | 63       |
| N60                | 1239416       | 3361228       | 255      | 88       |
| N70                | 1,028,899     | 2389863       | 339      | 122      |
| N80                | 811539        | 1837752       | 444      | 168      |
| N90                | 540118        | 1126120       | 587      | 233      |

---

\*\* Contig after scaffolding

---

**Supplemental Table 4. The length of psedo-chrmosomes in genome of *Coptis chinensis*.**

---

| Chrmosome ID | Length              |
|--------------|---------------------|
| Chr1         | 128756622           |
| Chr2         | 112244699           |
| Chr3         | 105526292           |
| Chr4         | 93906356            |
| Chr5         | 98305372            |
| Chr6         | 98076476            |
| Chr7         | 99670480            |
| Chr8         | 95914542            |
| Chr9         | 84534767            |
| Total        | 916,935,606(95.69%) |

---

**Supplemental Table 5. Coverage statistics of genome of *Coptis chinensis***

| Characteristic | Percentage               |        |
|----------------|--------------------------|--------|
| Reads          | Mapping rate (%)         | 96.79  |
|                | Average sequencing depth | 114.76 |
|                | Coverage (%)             | 99.85  |
| Genome         | Coverage at least 4X(%)  | 99.77  |
|                | Coverage at least 10X(%) | 99.65  |
|                | Coverage at least 20X(%) | 99.4   |

---

**Supplemental Table 6. CEGMA evaluation results.**

---

| Complete |                | Complete + partial |                |
|----------|----------------|--------------------|----------------|
| # Prots  | % Completeness | # Prots            | % Completeness |
| 227      | 91.53          | 236                | 95.16          |

---

Complete: core genes that were completely assembled with identity greater than 0.7.

Partial: core genes that were assembled but not complete.

# Prots: the number of core genes.

% Completeness: percentage of assembled core genes to core genes.

---

**Supplemental Table 7. BUSCO assessment of genome of *Coptis chinensis*.**

---

| Species                 | BUSCO notation assessment results            |
|-------------------------|----------------------------------------------|
| <i>Coptis chinensis</i> | C:94.3%[S:86.7%,D:7.6%],F:1.3%,M:4.4%,n:1614 |

---

#C: Complete Single-Copy BUSCOs; S : Complete and single-copy BUSCOs; D: Complete Duplicated BUSCOs; F: Fragmented BUSCOs; M: Missing BUSCOs; n: Total BUSCO groups searched

**Supplemental Table 8. The statistics of repeat sequences in genome of *Coptis chinensis***

| Type         | Repeat Size(bp) | % of genome |
|--------------|-----------------|-------------|
| Trf          | 45780607        | 4.78        |
| Repeatmasker | 540011062       | 56.35       |
| Proteinmask  | 199014763       | 20.77       |
| Total        | 595318868       | 62.13       |

**Supplemental Table 9. The statistics of tandem repeat elements in genome of *Coptis chinensis***

| Type    | Denovo+Rebase Length(bp) | % in Genome | TE proteins Length(bp) | % in Genome | Combined TEs Length(bp) | % in Genome |
|---------|--------------------------|-------------|------------------------|-------------|-------------------------|-------------|
| DNA     | 43488403                 | 4.54        | 27177795               | 2.84        | 59437400                | 6.2         |
| LINE    | 21386316                 | 2.23        | 30348024               | 3.17        | 41692022                | 4.35        |
| SINE    | 325789                   | 0.03        | 0                      | 0           | 325789                  | 0.03        |
| LTR     | 461603807                | 48.17       | 142112943              | 14.83       | 476662657               | 49.74       |
| Unknown | 19987462                 | 2.09        | 0                      | 0           | 19987462                | 2.09        |
| Total   | 540011062                | 56.35       | 199014763              | 20.77       | 581034160               | 60.63       |

**Supplemental Table 10. The statistics of gene structure in genome of *Coptis chinensis***

| Methods | Gene set             | Number | Average transcript length(bp) | Average CDS length(bp) | Average exons per gene | Average exon length(bp) | Average intron length(bp) |
|---------|----------------------|--------|-------------------------------|------------------------|------------------------|-------------------------|---------------------------|
| De novo | Augustus             | 46582  | 2822.45                       | 927.75                 | 4                      | 231.83                  | 631.16                    |
|         | GlimmerHMM           | 90383  | 9241.9                        | 561.71                 | 2.87                   | 195.45                  | 4632.23                   |
|         | SNAP                 | 68186  | 5601.86                       | 671.51                 | 4.11                   | 163.25                  | 1583.59                   |
|         | Geneid               | 77846  | 4591.44                       | 693.76                 | 4.12                   | 168.31                  | 1248.45                   |
|         | Genscan              | 49458  | 12433.01                      | 1089.48                | 6                      | 181.67                  | 2270.01                   |
| Homolog | Arabidopsis thaliana | 74185  | 1452.66                       | 696.1                  | 2.24                   | 310.41                  | 608.91                    |
|         | Beta vulgaris        | 55341  | 2296.58                       | 1040.29                | 2.84                   | 366.71                  | 683.96                    |
|         | Macleaya cordata     | 71722  | 2018.9                        | 795.92                 | 2.51                   | 317                     | 809.5                     |
|         | Nelumbo nucifera     | 32996  | 3597.18                       | 1228.59                | 3.62                   | 339.38                  | 904.02                    |
|         | Oryza sativa         | 55337  | 2049.74                       | 1040.22                | 2.53                   | 411.62                  | 661.05                    |
| RNAseq  | Solanum lycopersicum | 82108  | 1526.25                       | 784.51                 | 2.2                    | 357.16                  | 619.91                    |
|         | Vitis vinifera       | 48961  | 2138.13                       | 854.95                 | 2.95                   | 289.89                  | 658.31                    |
|         | PASA                 | 20154  | 4041.4                        | 1281.71                | 5.21                   | 245.99                  | 655.45                    |
|         | Cufflinks            | 60547  | 7089.25                       | 1976.87                | 5.98                   | 330.78                  | 1027.31                   |
|         | EVM                  | 53781  | 3135.82                       | 873.55                 | 3.98                   | 219.5                   | 759.23                    |
|         | Pasa-update*         | 53736  | 3106.59                       | 877.43                 | 3.99                   | 220.02                  | 746.06                    |
|         | Final set*           | 34109  | 3830.72                       | 1030.26                | 4.7                    | 219.39                  | 757.71                    |

**Supplemental Table 11. The statistics of annotated gene in genome of *Coptis chinensis***

| characters  | Number | Percent(%) |
|-------------|--------|------------|
| Total       | 34109  | -          |
| Swissprot   | 26818  | 78.6       |
| Nr          | 32481  | 95.2       |
| KEGG        | 25318  | 74.2       |
| InterPro    | 33639  | 98.6       |
| GO          | 30737  | 90.1       |
| Pfam        | 25147  | 73.7       |
| Annotated   | 33898  | 99.4       |
| Unannotated | 211    | 0.6        |

**Supplemental Table 12. The statistics of non-coding RNA in genome *Coptis chinensis*.**

| Type  | Copy(w*) | Average length(bp) | Total length(bp) | % of genome |
|-------|----------|--------------------|------------------|-------------|
| miRNA | 1050     | 113.56             | 119237           | 0.012443    |
| tRNA  | 996      | 76.38              | 76071            | 0.007939    |
| rRNA  | 2112     | 128.96             | 272354           | 0.028422    |
|       | 18S      | 49                 | 860.43           | 0.0044      |
| rRNA  | 28S      | 70                 | 141.93           | 0.001037    |
|       | 5.8S     | 20                 | 156.3            | 0.000326    |
|       | 5S       | 1973               | 110.05           | 0.022659    |
| snRNA | snRNA    | 1265               | 116.68           | 0.015403    |
|       | CD-box   | 844                | 104.15           | 0.009173    |
|       | HACA-box | 88                 | 128.85           | 0.001183    |
|       | splicing | 333                | 145.21           | 0.005046    |

**Supplemental Table 13. The KEGG enrichment result of specific gene families in *Coptis chinensis***

| MapID    | MapTitle                                               | Pvalue   | AdjustedPv  | Number | EnrichDirect |
|----------|--------------------------------------------------------|----------|-------------|--------|--------------|
| map00360 | Phenylalanine metabolism                               | 2.84E-06 | 0.000740709 | 36     | Over         |
| map00910 | Nitrogen metabolism                                    | 8.25E-06 | 0.000740709 | 25     | Over         |
| map00960 | Tropane, piperidine and pyridine alkaloid biosynthesis | 1.60E-05 | 0.000740709 | 28     | Over         |
| map03010 | Ribosome                                               | 0.00022  | 0.006307714 | 155    | Over         |
| map00400 | Phenylalanine, tyrosine and tryptophan biosynthesis    | 0.000299 | 0.007853052 | 33     | Over         |
| map00270 | Cysteine and methionine metabolism                     | 0.001072 | 0.020726313 | 56     | Over         |
| map00660 | C5-Branched dibasic acid metabolism                    | 0.001624 | 0.028420523 | 12     | Over         |
| map03420 | Nucleotide excision repair                             | 0.002824 | 0.041185144 | 50     | Over         |
| map04710 | Circadian rhythm                                       | 0.002876 | 0.041185144 | 35     | Over         |

**Supplemental Table 14. The KEGG enrichment result of expanded gene families in *Coptis chinensis***

| MapID    | MapTitle                                    | Pvalue      | AdjustedPv  | Gene_Number |
|----------|---------------------------------------------|-------------|-------------|-------------|
| map00480 | Glutathione metabolism                      | 1.29E-29    | 4.92E-28    | 33          |
| map00670 | One carbon pool by folate                   | 1.12E-14    | 2.84E-13    | 13          |
| map00561 | Glycerolipid metabolism                     | 2.83E-13    | 5.39E-12    | 22          |
| map04139 | Regulation of mitophagy - yeast             | 0.000208107 | 0.002636018 | 6           |
| map03440 | Homologous recombination                    | 0.000647791 | 0.007033159 | 7           |
| map04141 | Protein processing in endoplasmic reticulum | 0.001526928 | 0.012894056 | 14          |
| map00450 | Selenocompound metabolism                   | 0.00198186  | 0.015062137 | 4           |
| map03460 | Fanconi anemia pathway                      | 0.005716913 | 0.039498671 | 7           |
| map00950 | Isoquinoline alkaloid biosynthesis          | 0.008310742 | 0.045788948 | 5           |
| map00564 | Glycerophospholipid metabolism              | 0.008434806 | 0.045788948 | 8           |

**Supplemental Table 15. The KEGG enrichment result of positively selected genes in *Coptis chinensis***

| MapID    | MapTitle                                               | Pvalue      | AdjustedPv  | Gene Number |
|----------|--------------------------------------------------------|-------------|-------------|-------------|
| map00232 | Caffeine metabolism                                    | 0.008087147 | 0.24633729  | 1           |
| map03015 | mRNA surveillance pathway                              | 0.035409836 | 0.24633729  | 2           |
| map00196 | Photosynthesis - antenna proteins                      | 0.053411026 | 0.24633729  | 1           |
| map00983 | Drug metabolism - other enzymes                        | 0.059177582 | 0.24633729  | 1           |
| map00220 | Arginine biosynthesis                                  | 0.071558996 | 0.24633729  | 1           |
| map00960 | Tropane, piperidine and pyridine alkaloid biosynthesis | 0.081916094 | 0.24633729  | 1           |
| map03013 | RNA transport                                          | 0.092889543 | 0.24633729  | 2           |
| map00250 | Alanine, aspartate and glutamate metabolism            | 0.10413861  | 0.24633729  | 1           |
| map00360 | Phenylalanine metabolism                               | 0.107792969 | 0.24633729  | 1           |
| map00400 | Phenylalanine, tyrosine and tryptophan biosynthesis    | 0.112341265 | 0.24633729  | 1           |
| map03430 | Mismatch repair                                        | 0.11415449  | 0.24633729  | 1           |
| map00330 | Arginine and proline metabolism                        | 0.120473469 | 0.24633729  | 1           |
| map00950 | Isoquinoline alkaloid biosynthesis                     | 0.120473469 | 0.24633729  | 1           |
| map04530 | Tight junction                                         | 0.123168645 | 0.24633729  | 1           |
| map01210 | 2-Oxocarboxylic acid metabolism                        | 0.133872116 | 0.252869552 | 1           |
| map00350 | Tyrosine metabolism                                    | 0.151439471 | 0.268128605 | 1           |
| map00860 | Porphyrin and chlorophyll metabolism                   | 0.170377483 | 0.268128605 | 1           |
| map04146 | Peroxisome                                             | 0.177165242 | 0.268128605 | 1           |
| map00270 | Cysteine and methionine metabolism                     | 0.216003497 | 0.284576648 | 1           |
| map00520 | Amino sugar and nucleotide sugar metabolism            | 0.24924944  | 0.313869666 | 1           |
| map00240 | Pyrimidine metabolism                                  | 0.314668848 | 0.378881647 | 1           |
| map03018 | RNA degradation                                        | 0.323163758 | 0.378881647 | 1           |
| map00230 | Purine metabolism                                      | 0.360183687 | 0.408208179 | 1           |
| map01230 | Biosynthesis of amino acids                            | 0.441081056 | 0.463583318 | 1           |
| map04144 | Endocytosis                                            | 0.441081056 | 0.463583318 | 1           |
| map03040 | Spliceosome                                            | 0.459037892 | 0.463583318 | 1           |
| map04141 | Protein processing in endoplasmic reticulum            | 0.463583318 | 0.463583318 | 1           |

**Supplemental Tables 16. Summary of intact LTRs with at least one protein-coding gene in *C. chinensis*.**

| Species             | Copies |       |        | Length (Mb) |       |        |
|---------------------|--------|-------|--------|-------------|-------|--------|
|                     | Gypsy  | Copia | Others | Gypsy       | Copia | Others |
| <i>C. chinensis</i> | 15379  | 3704  | 14     | 187.96      | 23.96 | 0.14   |
| <i>M. cordata</i>   | 1638   | 1811  | 6      | 15.02       | 13.09 | 0.03   |
| <i>A. coerulea</i>  | 2217   | 1991  | 21     | 21.43       | 13.83 | 0.24   |

**Supplemental Tables 17. The proportion (%) of lineages in Ty1/copia super family.**

|                     | Angela | Ale   | Bianca | Ivana | Maximus | TAR   |
|---------------------|--------|-------|--------|-------|---------|-------|
| <i>C. chinensis</i> | 8.57   | 18.00 | 0.87   | 3.17  | 0       | 69.09 |
| <i>M. cordata</i>   | 14.75  | 23.01 | 23.50  | 1.46  | 6.32    | 30.96 |
| <i>A. coerulea</i>  | 3.05   | 17.97 | 4.07   | 9.66  | 23.90   | 41.36 |

**Supplemental Tables 18. The proportion (%) of lineages in Ty3/gypsy super family.**

|                     | Tekay | Tat   | CRM  | Athila | Galadriel | Reina |
|---------------------|-------|-------|------|--------|-----------|-------|
| <i>C. chinensis</i> | 4.71  | 40.17 | 0.96 | 53.02  | 0         | 1.13  |
| <i>M. cordata</i>   | 36.79 | 26.68 | 9.59 | 17.62  | 1.81      | 7.51  |
| <i>A. coerulea</i>  | 6.34  | 78.46 | 5.07 | 5.56   | 2.05      | 2.53  |

**Supplemental Tables 19. The main identified BIA pathway biosynthetic enzyme genes from *C. chinensis*, *A. coerulea*, *M. cordata* and *A. thaliana*.**

| Genes  | <i>C. chinensis</i> | <i>A. coerulea</i> | <i>M. cordata</i> | <i>A. thaliana</i> |
|--------|---------------------|--------------------|-------------------|--------------------|
| 3OHase | 10                  | 9                  | 9                 | 14                 |
| 4'OMT  | 1                   | 1                  | 1                 | 0                  |
| 6OMT   | 4                   | 3                  | 2                 | 0                  |
| BBE    | 2                   | 5                  | 2                 | 14                 |
| CAS    | 2                   | 8                  | 1                 | 0                  |
| CNMT   | 6                   | 3                  | 6                 | 1                  |
| CoOMT  | 5                   | 2                  | 0                 | 0                  |
| CTS    | 1                   | 1                  | 0                 | 0                  |
| NCS    | 11                  | 5                  | 3                 | 0                  |
| NMCH   | 4                   | 3                  | 1                 | 0                  |
| SOMT   | 2                   | 2                  | 1                 | 0                  |
| STOX   | 8                   | 13                 | 32                | 2                  |
| TryAT  | 2                   | 3                  | 4                 | 6                  |
| TYDC   | 5                   | 3                  | 14                | 2                  |
