# Supplementary material for: The chromosome-level reference genome of Coptischinensis provides insights into genomic evolution and berberine biosynthesis
Source: PubMed Central journal article supplement (PMC8166882; doi:10.1038/s41438-021-00559-2), 2021-06-01
Supplement: 41438_2021_559_MOESM7_ESM.pdf [file 41438_2021_559_MOESM7_ESM.pdf]

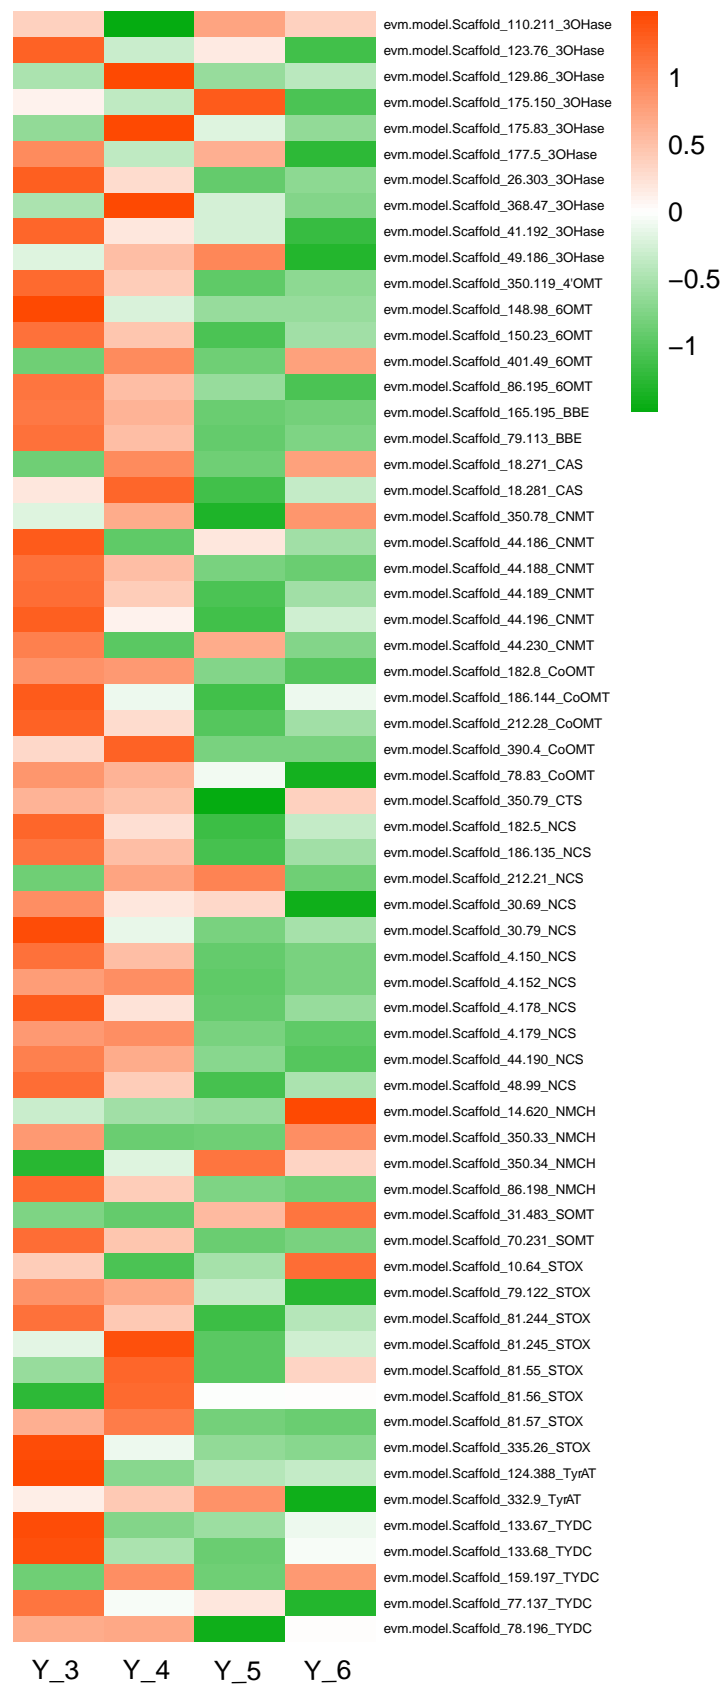

Supplemental Figure 6. Expression levels of candidate genes involved in BIA biosynthesis in roots from three to six years in *C. chinensis*.
